# Supplementary material for: Exhaled air dispersion during bag-mask ventilation and sputum suctioning - Implications for infection control
Source: PubMed Central journal article supplement (PMC5760517; doi:10.1038/s41598-017-18614-1), 2018-01-09
Supplement: 41598_2017_18614_MOESM1_ESM.pdf [file 41598_2017_18614_MOESM1_ESM.pdf]

**Supplementary Tables 1-4**

**Exhaled air dispersion during bag-mask ventilation and sputum suctioning - Implications for  
infection control**

Matthew TV Chan, Benny K Chow, Thomas Lo, Fanny W Ko, Susanna S Ng, Tony Gin, David S Hui

**Supplementary Table 1.** Differences of dispersion distance of exhaled air during bag-mask ventilation between nurses and anesthesiologists/intensivists, respiratory physicians or medical students, using Laerdal silicone resuscitator; Ambu silicone resuscitator with and without breathing filter.

|                                                         | Mean difference (95%CI) (mm) | * <i>p</i> value |
|---------------------------------------------------------|------------------------------|------------------|
| <b>Overall</b>                                          |                              |                  |
| Nurses – Anesthesiologists/Intensivists                 | 69 (42 – 96)                 | <0.001           |
| Nurses – Respiratory physicians                         | 72 (45 – 99)                 | <0.001           |
| Nurses – Medical students                               | 67 (40 – 94)                 | <0.001           |
| <b>Laerdal silicone resuscitator</b>                    |                              |                  |
| Nurses – Anesthesiologists/Intensivists                 | 70 (-0.5 – 140)              | 0.052            |
| Nurses – Respiratory physicians                         | 44 (-26 – 114)               | 0.476            |
| Nurses – Medical students                               | 23 (-15 – 125)               | 0.187            |
| <b>Ambu silicone resuscitator</b>                       |                              |                  |
| Nurses – Anesthesiologists/Intensivists                 | 25 (-43 – 94)                | >0.999           |
| Nurses – Respiratory physicians                         | 80 (12 – 149)                | 0.017            |
| Nurses – Medical students                               | 33 (-36 – 101)               | >0.999           |
| <b>Ambu silicone resuscitator with breathing filter</b> |                              |                  |
| Nurses – Anesthesiologists/Intensivists                 | 114 (42 – 185)               | 0.001            |
| Nurses – Respiratory physicians                         | 93 (22 – 165)                | 0.007            |
| Nurses – Medical students                               | 112 (41 – 184)               | 0.001            |

\*General linear model with *post hoc* Bonferroni test.  
 CI = confidence intervals

**Supplementary Table 2.** Differences of dispersion distance of exhaled air during bag-mask ventilation using Laerdal silicone resuscitator, stratified by anesthesiologists/intensivists, respiratory physicians, medical students and nurses.

|                                                                        | Mean difference (95%CI) (mm) | * <i>p</i> value |
|------------------------------------------------------------------------|------------------------------|------------------|
| <b>Overall</b>                                                         |                              |                  |
| Ambu silicone resuscitator – Laerdal silicone resuscitator             | 44 (21 – 68)                 | <0.001           |
| Ambu silicone resuscitator – Ambu silicone resuscitator with filter    | 71 (42 – 100)                | <0.001           |
| Laerdal silicone resuscitator – Ambu silicone resuscitator with filter | 27 (-2 – 56)                 | 0.074            |
| <b>Anesthesiologists/Intensivists</b>                                  |                              |                  |
| Ambu silicone resuscitator - Laerdal silicone resuscitator             | 81 (51– 111)                 | <0.001           |
| Ambu silicone resuscitator - Ambu silicone resuscitator with filter    | 114 (84 – 144)               | <0.001           |
| Laerdal silicone resuscitator – Ambu silicone resuscitator with filter | 33 (3 – 63)                  | 0.029            |
| <b>Respiratory physicians</b>                                          |                              |                  |
| Ambu silicone resuscitator - Laerdal silicone resuscitator             | 0 (-29 – 29)                 | >0.999           |
| Ambu silicone resuscitator - Ambu silicone resuscitator with filter    | 39 (10 – 69)                 | 0.009            |
| Laerdal silicone resuscitator – Ambu silicone resuscitator with filter | 39 (10 – 68)                 | 0.009            |
| <b>Medical Students</b>                                                |                              |                  |
| Ambu silicone resuscitator - Laerdal silicone resuscitator             | 59 (-23 – 141)               | 0.205            |
| Ambu silicone resuscitator - Ambu silicone resuscitator with filter    | 106 (24 – 188)               | 0.011            |
| Laerdal silicone resuscitator – Ambu silicone resuscitator with filter | 47 (-35 – 129)               | 0.419            |
| <b>Nurses</b>                                                          |                              |                  |
| Ambu silicone resuscitator - Laerdal silicone resuscitator             | 37 (-54 – 128)               | 0.858            |
| Ambu silicone resuscitator - Ambu silicone resuscitator with filter    | 26 (-65 – 117)               | >0.999           |
| Laerdal silicone resuscitator – Ambu silicone resuscitator with filter | -11 (-102 – 80)              | >0.999           |

\*General linear model with *post hoc* Bonferroni test.

CI = confidence intervals

**Supplementary Table 3.** Dispersion distances of exhaled air in the median sagittal plane during normal, mild and poor cough before and after oro-tracheal suctioning in a human patient simulator with and without tracheal intubation

|                                    | Coughing efforts |                 |                 |
|------------------------------------|------------------|-----------------|-----------------|
|                                    | Normal           | Mild            | Poor            |
| <b>Without tracheal intubation</b> |                  |                 |                 |
| No suctioning                      | 860 ± 93         | 290 ± 43        | 185 ± 19        |
|                                    | 845 (771 – 959)  | 299 (284 – 328) | 179 (172 – 195) |
| Intermittent suctioning            | 708 ± 105        | 269 ± 71        | 170 ± 33        |
|                                    | 687 (638 – 810)  | 268 (220 – 314) | 174 (141 – 199) |
| Continuous suctioning              | 595 ± 122        | 232 ± 70        | 164 ± 31        |
|                                    | 623 (478 – 694)  | 223 (189 – 295) | 166 (134 – 185) |
| <b>With tracheal intubation</b>    |                  |                 |                 |
| No suctioning                      | 460 ± 127        | 305 ± 77        | 189 ± 63        |
|                                    | 443 (363 – 567)  | 288 (244 – 365) | 175 (142 – 212) |
| Continuous suctioning              | 259 ± 45         | 174 ± 26        | 137 ± 27        |
|                                    | 269 (210 – 299)  | 178 (155 – 193) | 138 (113 – 156) |

Values are mean ± standard deviations, median (interquartile range).

**Supplementary Table 4.** Effect of Continuous or intermittent suctioning on the dispersion distance of exhaled air with and without tracheal intubation in the sagittal plane.

|                                         | Mean difference<br>(95%CI) mm | Percentage change in<br>dispersion distance | * <i>p</i> value |
|-----------------------------------------|-------------------------------|---------------------------------------------|------------------|
| <b>Tracheal intubation</b>              |                               |                                             |                  |
| <i>Overall</i>                          |                               |                                             |                  |
| No suctioning – continuous suctioning   | 128 (103 – 153)               | -40.3%                                      | <0.001           |
| <i>Normal coughing effort</i>           |                               |                                             |                  |
| No suctioning – continuous suctioning   | 201 (140 – 262)               | -43.7%                                      | <0.001           |
| <i>Mild coughing effort</i>             |                               |                                             |                  |
| No suctioning – continuous suctioning   | 305 (278 – 331)               | -43.0%                                      | <0.001           |
| <i>Poor coughing effort</i>             |                               |                                             |                  |
| No suctioning – continuous suctioning   | 52 (21 – 83)                  | -27.6%                                      | 0.002            |
| <b>Without tracheal intubation</b>      |                               |                                             |                  |
| <i>Overall</i>                          |                               |                                             |                  |
| No suctioning – continuous suctioning   | 305 (270 – 340)               | -48.0%                                      | <0.001           |
| No suctioning – intermittent suctioning | 253 (218 – 288)               | -39.8%                                      | <0.001           |
| Intermittent – continuous suctioning    | 52 (17 – 87)                  | -13.6%                                      | 0.001            |
| <i>Normal coughing effort</i>           |                               |                                             |                  |
| No suctioning – continuous suctioning   | 266 (182 – 349)               | -30.9%                                      | <0.001           |
| No suctioning – intermittent suctioning | 152 (68 – 236)                | -17.7%                                      | <0.001           |
| Intermittent – continuous suctioning    | 113 (29 – 197)                | -13.6%                                      | 0.005            |
| <i>Mild coughing effort</i>             |                               |                                             |                  |
| No suctioning – continuous suctioning   | 628 (567 – 690)               | -73.0%                                      | <0.001           |
| No suctioning – intermittent suctioning | 591 (530 – 653)               | -68.8%                                      | <0.001           |
| Intermittent – continuous suctioning    | 37 (-25 – 98)                 | -13.6%                                      | 0.441            |
| <i>Poor coughing effort</i>             |                               |                                             |                  |
| No suctioning – continuous suctioning   | 21 (-1 – 43)                  | -11.2%                                      | 0.065            |
| No suctioning – intermittent suctioning | 15 (-7 – 37)                  | -8.2%                                       | 0.297            |
| Intermittent – continuous suctioning    | 6 (-16 – 28)                  | -3.6%                                       | >0.999           |

\*General linear model with *post hoc* Bonferroni test.

CI = confidence intervals
